# Supplementary material for: Ruthenium polypyridyl complexes and their modes of interaction with DNA: Is there a correlation between these interactions and the antitumor activity of the compounds?
Source: PubMed Central journal article supplement — J Biol Inorg Chem. 2008 Dec 16;14(3):439–48. doi: 10.1007/s00775-008-0460-x (PMC3036821; doi:10.1007/s00775-008-0460-x), 2008-12-16
Supplement: 775_2008_460_MOESM1_ESM.pdf [file 775_2008_460_MOESM1_ESM.pdf]

# Ruthenium polypyridyl complexes and their ways of interaction with DNA: is there a correlation between these interactions and the antitumor activity of the compounds?

Eva Corral<sup>a</sup>, Anna C.G. Hotze<sup>b</sup>, Hans den Dulk<sup>a</sup>, Anna Leczkowska<sup>b</sup>, Alison Rodger,<sup>c</sup> Michael J. Hannon<sup>b</sup> (✉) and Jan Reedijk<sup>a</sup> (✉)

- (a) Leiden Institute of Chemistry, Gorlaeus Laboratories, Leiden University, P.O. Box 9502, 2300 RA Leiden, The Netherlands. Fax: +31 71 527 4671. E-mail: Reedijk@chem.leidenuniv.nl
- (b) School of Chemistry, University of Birmingham, Edgbaston, Birmingham B15 2TT, United Kingdom. Fax: +44 121 414 7871. E-mail: m.j.hannon@bham.ac.uk
- (c) Department of Chemistry, University of Warwick, Coventry CV4 7AL, United Kingdom.

**Supporting information**

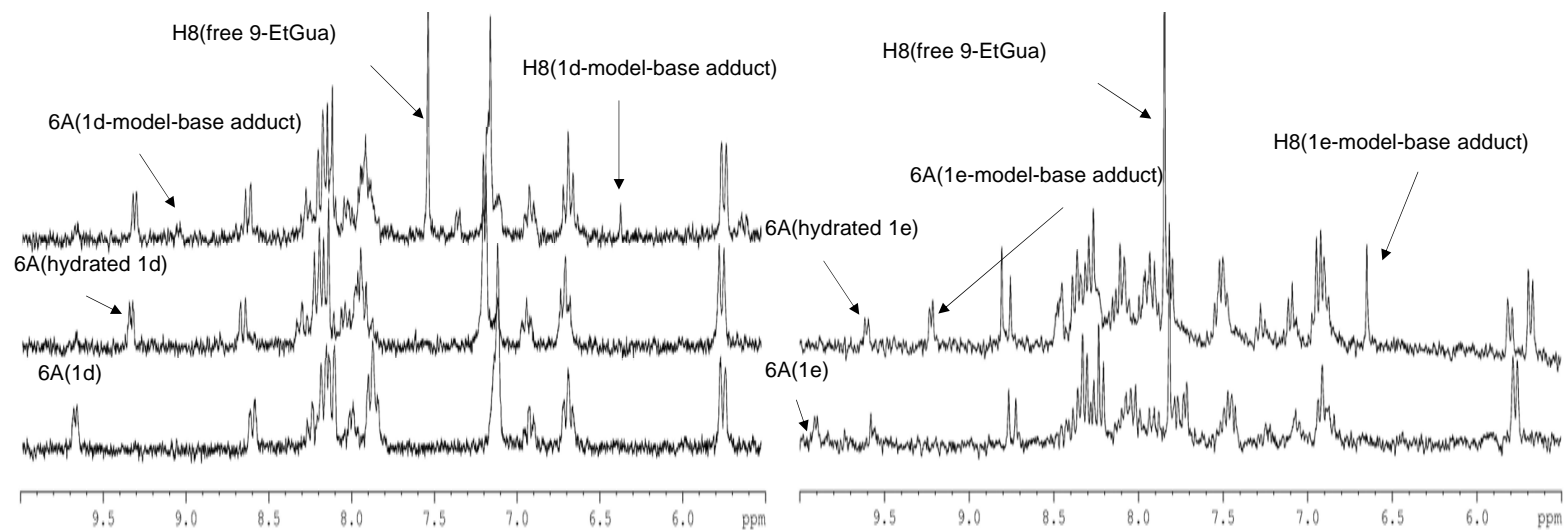

**Supporting information Figure S1.**  $^1\text{H}$  NMR studies of the reactions **1d** + 9-EtGua in  $\text{D}_2\text{O}$  (left) and **1e** + 9-EtGua in  $\text{D}_2\text{O}$  (right). The spectra on the left hand-side show the complex **1d** in  $\text{D}_2\text{O}$  at time = 0 (below), the complex **1d** in  $\text{D}_2\text{O}$  at time = 24 h (centre) and the mixture **1d** + 9-EtGua at time = 24 h (above). The spectra on the right hand-side show the mixture **1e** + 9-EtGua at time = 30 min (below) and at time = 24 h (above). The peaks assigned to the proton 6A in each complex are labeled, as well as the peaks assigned to the proton H8 of 9-EtGua, both in the free ligand and in the Ru-model base adduct.

**Supporting information Table S1.** Chemical shifts of the peaks assigned to the protons 6A and H8, indicative of the formation of the corresponding ruthenium-model base adducts.

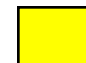

| Complex                                       | 6A(ppm) | H8(ppm) |
|-----------------------------------------------|---------|---------|
| Free 9-EtGua                                  | ---     | 7.81    |
| <b>1b</b> (= hydrated <b>1a</b> , <b>1c</b> ) | 9.46    | ---     |
| <b>1a-c</b> -model base adduct                | 9.21    | 6.81    |
| <b>1d</b>                                     | 9.71    | ---     |
| Hydrated <b>1d</b>                            | 9.40    | ---     |
| <b>1d</b> -model base adduct                  | 9.15    | 6.76    |
| <b>1e</b>                                     | 9.90    | ---     |
| Hydrated <b>1e</b>                            | 9.57    | ---     |
| <b>1e</b> -model base adduct                  | 9.19    | 6.62    |
